# Supplementary material for: Regular lung recruitment maneuvers during high-frequency oscillatory ventilation in extremely preterm infants: a randomized controlled trial
Source: Springer Nature journal article supplement (doi:10.1186/s12887-022-03780-7), 2022-12-12

**Supplementary figure:** Example of a stepwise oxygenation guided lung recruitment maneuver during high frequency oscillatory ventilation. MAP, mean airway pressure [cmH<sub>2</sub>O]; V<sub>t</sub>, tidal volume [mL]; Amp, amplitude [cmH<sub>2</sub>O].

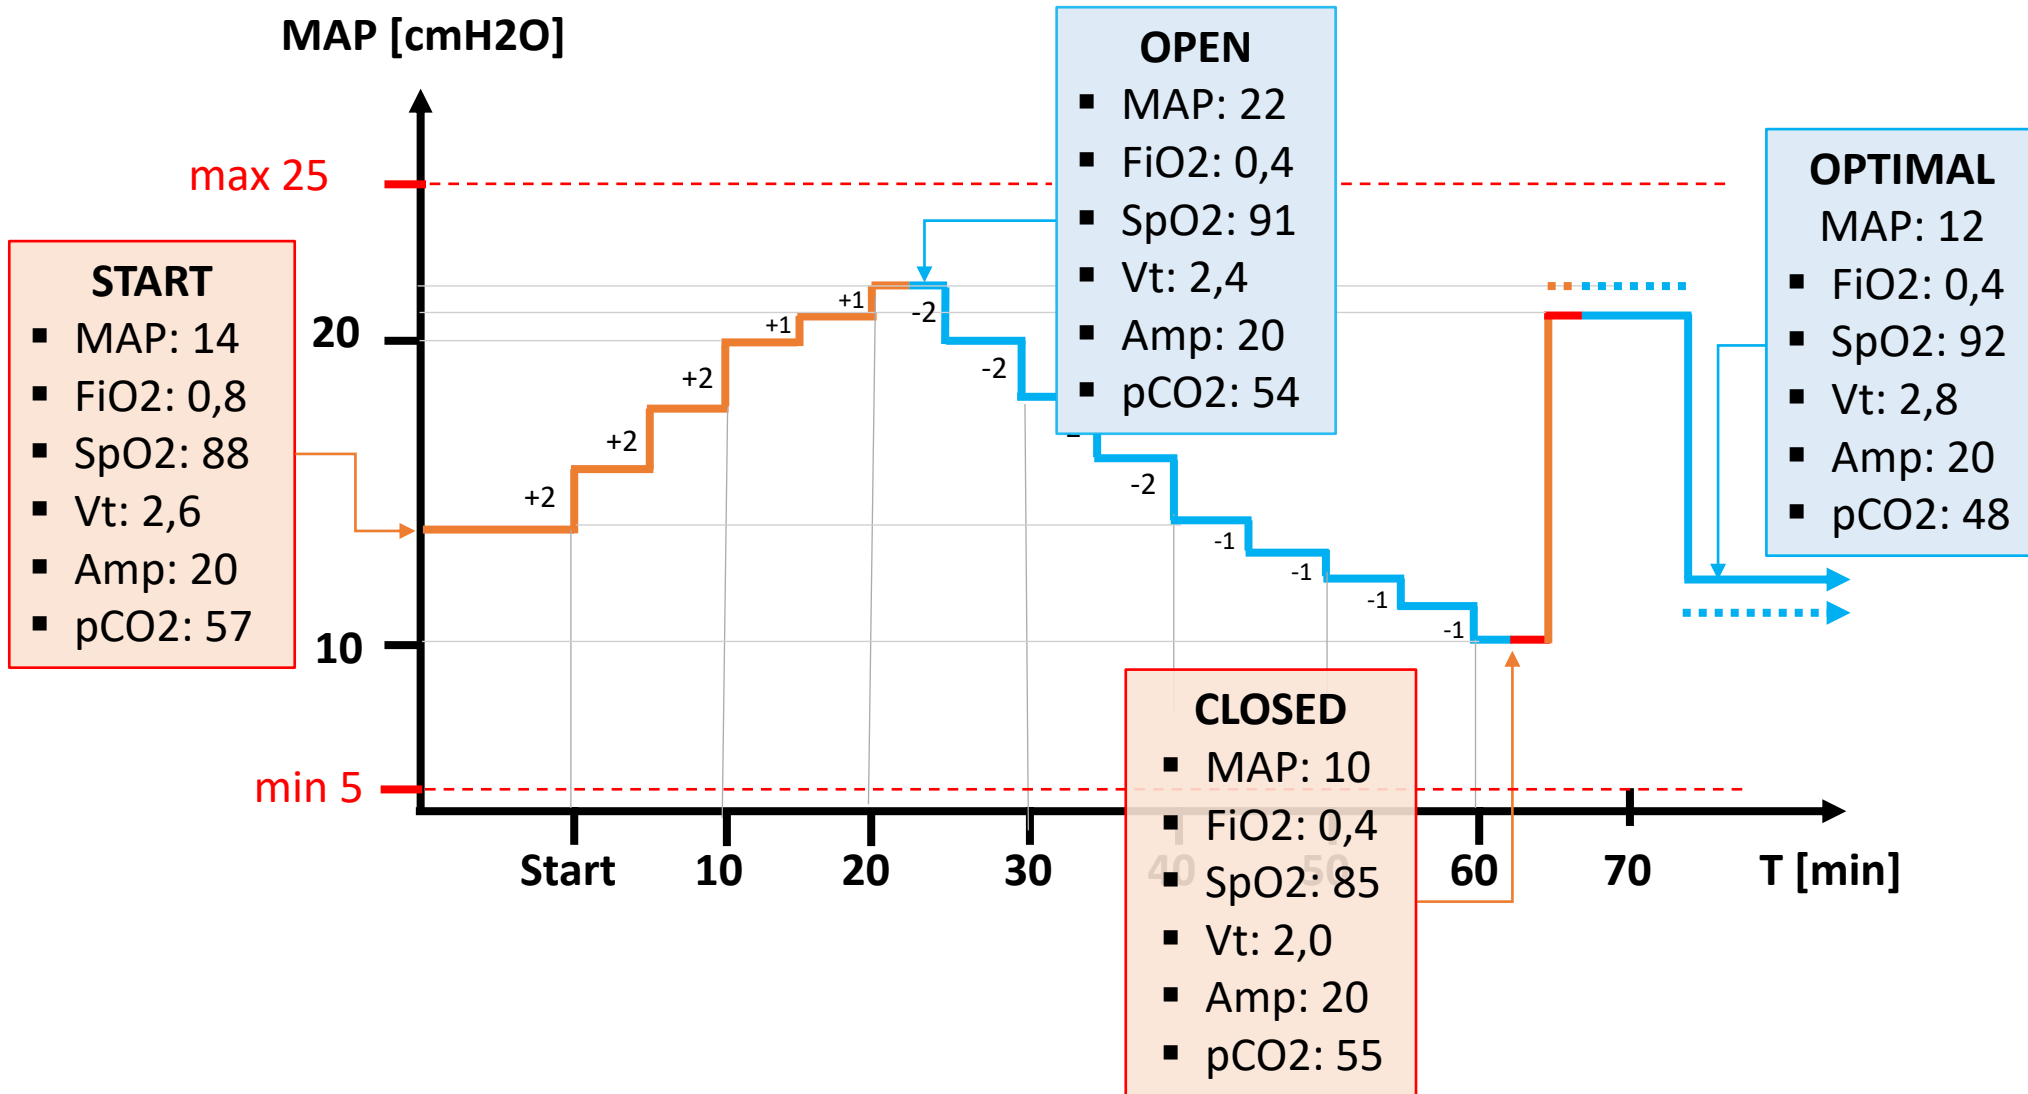

Supplement: MOESM1 [file 23816122]
